# Supplementary material for: White-light-controlled ferromagnetic and ferroelectric properties of multiferroic single-crystalline BiFeO3nanoflowers at room temperature
Source: Royal Society of Chemistry journal article supplement (doi:10.1039/c4tc01196a), 2014-07-15
Supplement: c4tc01196a1.pdf [file c4tc01196a1.pdf]

1 **White-light controlled ferromagnetic and ferroelectric properties in**  
2 **multiferroic single-crystalline BiFeO<sub>3</sub> nanoflowers at room**  
3 **temperature**

4 Bai Sun, Lujun Wei, Hongwei Li, Peng Chen

5

6 **Supplementary Information**

7

8 **XRD and EDX measurement**

9 Microstructure of BiFeO<sub>3</sub> nanoflowers was characterized at room temperature by X-ray  
10 diffraction (XRD, Shimadzu XRD-7000 X-ray diffractometer) with Cu K $\alpha$  radiation, as shown in  
11 Figure 1(a). We put BiFeO<sub>3</sub> nanoflowers powder with mass about 2 g on a glass plate, and  
12 characterized the sample by XRD for 2 $\theta$  range from 15° to 80°, where the scan speed is 1.5° per  
13 minute.

14 The EDX and SEM data of BiFeO<sub>3</sub> nanoflowers were characterized using scanning electron  
15 microscopy at room temperature (SEM, JSM-6510). Firstly, we dissolved BiFeO<sub>3</sub> nanoflowers in  
16 alcohol, then, it was dispersed on a piece of aluminum. After alcohol was volatized, EDX and SEM  
17 characterization were carried out.

18

19 **TEM and HRTEM measurement**

20 TEM and HRTEM images and SAED patterns were recorded digitally with a SIS charge-  
21 coupled device (CCD) camera and TEM analysis software on a JEOL 2010 electron microscope  
22 operating at 200 kV at room temperature. Firstly, we dissolved the BiFeO<sub>3</sub> nanoflowers in alcohol,  
23 then, it be dispersed in a copper grid. After dried for 4 hours at 60 °C, the sample was put in the

24 TEM high vacuum cavity for TEM characterization. In order to demonstrate the BiFeO<sub>3</sub>  
25 nanoflowers are single crystalline, we selected several BiFeO<sub>3</sub> nanoflowers to do HRTEM images  
26 and selected area electron diffraction (SAED). The results show that the BiFeO<sub>3</sub> nanoflowers are  
27 single crystalline.

28

## 29 **Magnetic measurement**

30 Magnetic properties were characterized by a vibrating sample magnetometer (VSM) from  
31 ADE Corporation in USA. For the saturation magnetization measurement, the sample with mass 0.1  
32 g packed in small glass box was measured. For the white-light-controlled ferromagnetism and the  
33 temperature-dependent magnetization measurement, the sample with much less mass was uniformly  
34 dispersed on adhesive plastic tape for measurement. In order to evenly illuminate these BiFeO<sub>3</sub>  
35 nanoflowers, the sample with much less mass was used for measurement. The magnetisms of the  
36 small glass box and the plastic tape were firstly measured and then subtracted from the measured  
37 magnetism of the sample. The light power density was controlled by changing the distance between  
38 the sample and the lamp. The light power density was measured by irradiatometer. In order to  
39 exclude the thermal effect of the lamp on the sample, the distance between the sample and the lamp  
40 was always more than 30 cm. In addition, we used a local temperature sensor to test the effect of  
41 heating during illumination again, and we found there was a temperature increase of about 4°C after  
42 our sample was illuminated by white light with power density 65 mW/cm<sup>2</sup> for 1 hour. The  
43 magnetization of the BiFeO<sub>3</sub> nanoflowers with at applied magnetic field 0.1 T decreases just about  
44 0.28% when its temperature increases from room temperature 16°C to 20°C (not show here).

45 Therefore, we can eliminate the influence of white-light heating on magnetic properties of BiFeO<sub>3</sub>  
46 nanoflowers.

47

#### 48 **Ferroelectric measurements**

49 The measurements of ferroelectric hysteresis loops (P–E) were performed by a Precision  
50 Premier Workstation ferroelectric test system (Radiant Technology, USA) at room temperature.  
51 First, we dissolved BiFeO<sub>3</sub> nanoflowers in alcohol, and then, it was dispersed on an insulated  
52 silicon substrate with SiO<sub>2</sub> layer. After dried for 4 hours at 60 °C, the silicon substrate with BiFeO<sub>3</sub>  
53 nanoflowers was covered mask plate, and placed into a vacuum deposition system. Then, many Ag  
54 electrodes were deposited on the surface of silicon substrate. In order to measure the ideal data, we  
55 tested one by one electrode during the ferroelectric measurements to exclude the poor electrode  
56 contact. An ordinary filament lamp was used as light source in this experiment. And in order to  
57 exclude the thermal effect of the lamp on the sample, the distance between the sample and the lamp  
58 is always more than 30 cm. Because the cross-sectional areas of these BiFeO<sub>3</sub> nanoflowers are  
59 unknown, the unit of the measured ferroelectric polarization P is μC.

60
